# Supplementary material for: High Throughput Quantitative Bioanalytical LC/MS/MS Determination of Gemifloxacin in Human Urine
Source: Hindawi journal article supplement (doi:10.1155/2013/905704), 2013-01-01

## Representative chromatograms for robustness assessed parameters:

### 1) pH

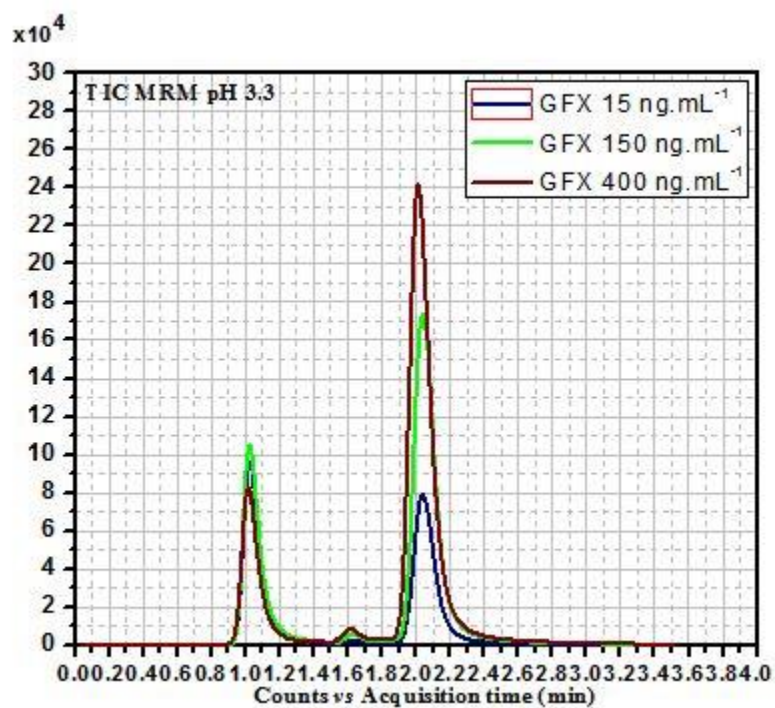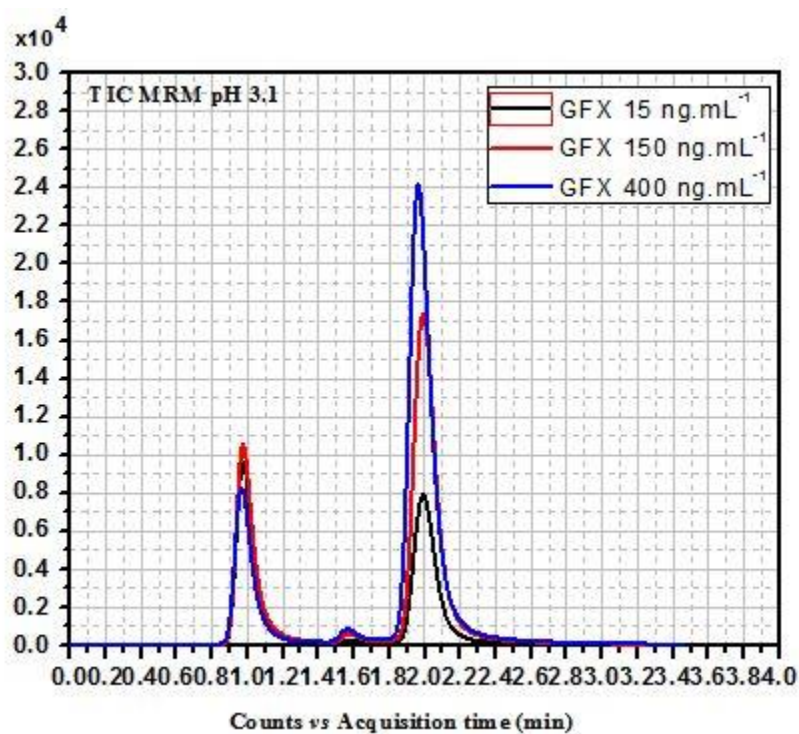

2) Flow rate:

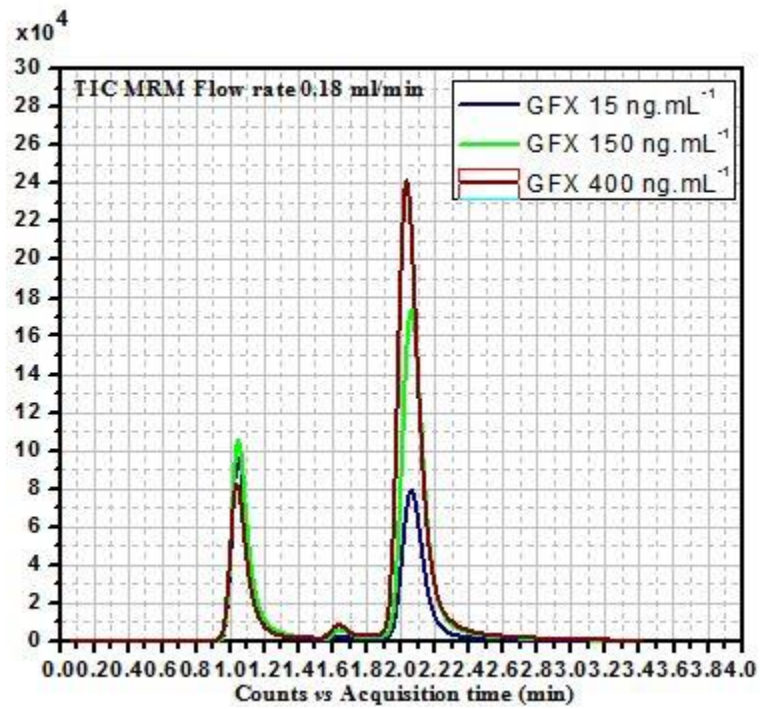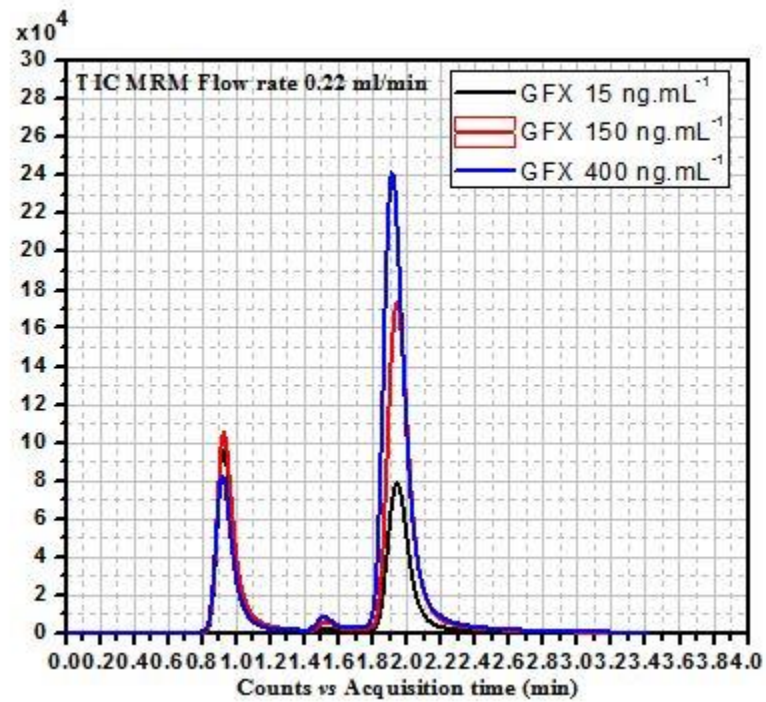

### 3) % of organic solvent in mobile phase:

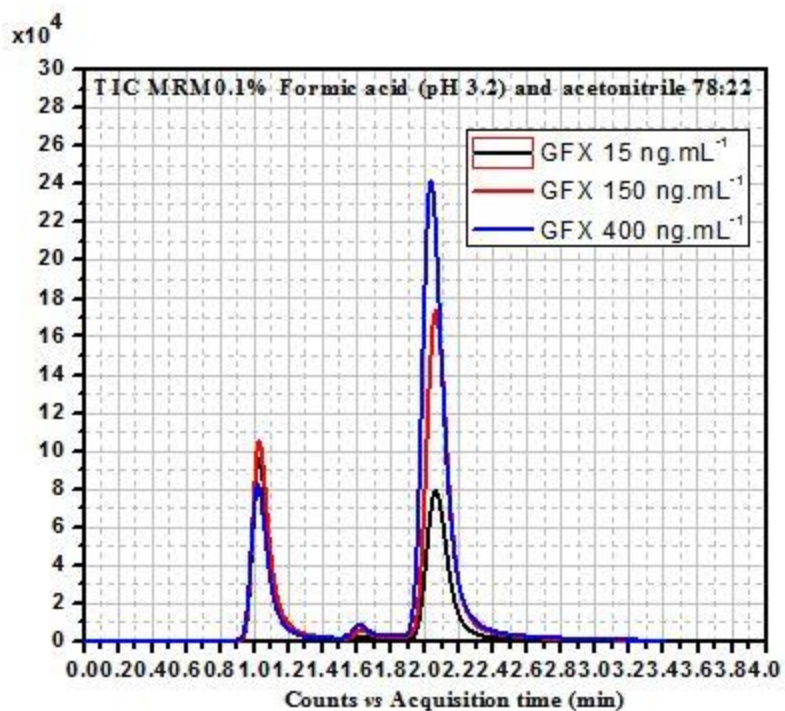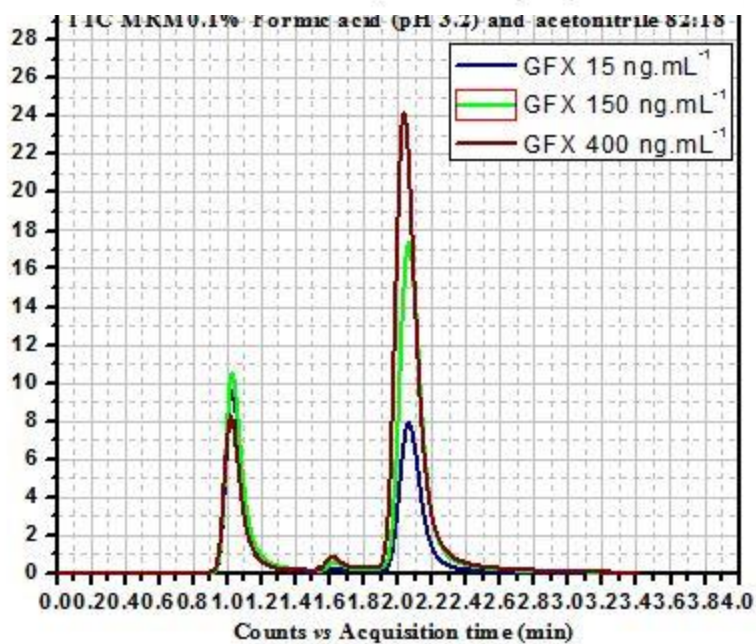

Supplement: f1 [file 905704.f1.pdf]
